# Supplementary material for: Cytochrome c Oxidase Biogenesis and Metallochaperone Interactions: Steps in the Assembly Pathway of a Bacterial Complex
Source: PLOS journal article supplement (doi:10.1371/journal.pone.0170037), 2017-01-20
Supplement: S2 (10.1371/journal.pone.0170037.s002) [file journal.pone.0170037.s002.pdf]

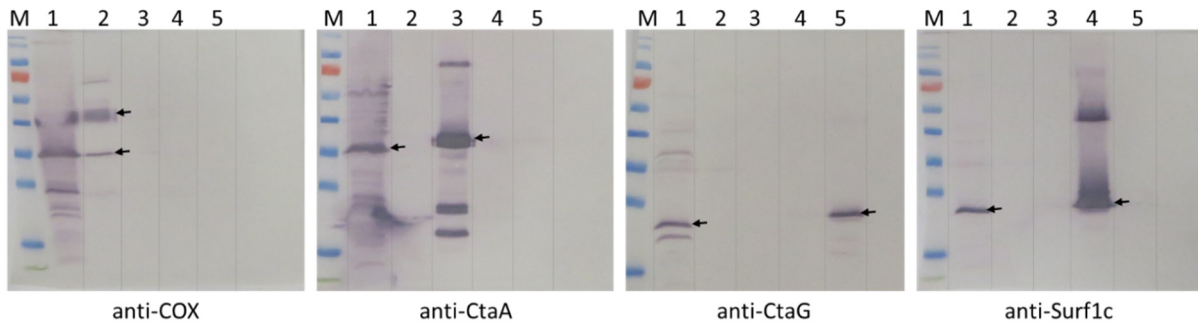

**S2 Fig. Specificity of antisera used in pull-down experiments.** In order to check antibody specificity, the following samples were loaded onto a 12 % SDS-PAGE and blotted onto nitrocellulose membrane for subsequent Western blot analysis. Blots were probed with the indicated polyclonal rabbit antisera (anti-COX, anti-CtaG (see also Gurumoorthy P, Ludwig B. Deciphering protein-protein interactions during the biogenesis of cytochrome *c* oxidase from *Paracoccus denitrificans*. The FEBS journal. 2015;282(3):537-49), anti-Surf1c and anti-CtaA (custom immunization, Cambridge Research Biochemicals)) and developed by incubation with protein A-alkaline phosphatase as described in Materials and Methods: M, prestained protein ladder (Thermo Fisher Scientific, 26616); 1, 100  $\mu$ g *P. denitrificans* (Pd1222) wildtype membranes; 2, 0.1  $\mu$ g purified cytochrome *c* oxidase from *P. denitrificans*; 3, 0.1  $\mu$ g purified CtaA from *P. denitrificans* (His<sub>6</sub>-tagged construct); 4, 0.1  $\mu$ g purified Surf1c from *P. denitrificans* (His<sub>10</sub>-tagged construct); 5, 0.1  $\mu$ g purified CtaG from *P. denitrificans* (His<sub>6</sub>-tagged construct). Protein bands at appropriate sizes are indicated by arrows (panel anti-CtaA, lane 3: lower molecular weight bands may represent proteolytic digestion fragments).
