# Supplementary material for: Cytochrome c Oxidase Biogenesis and Metallochaperone Interactions: Steps in the Assembly Pathway of a Bacterial Complex
Source: PLOS journal article supplement (doi:10.1371/journal.pone.0170037), 2017-01-20
Supplement: S3 (10.1371/journal.pone.0170037.s003) [file journal.pone.0170037.s003.pdf]

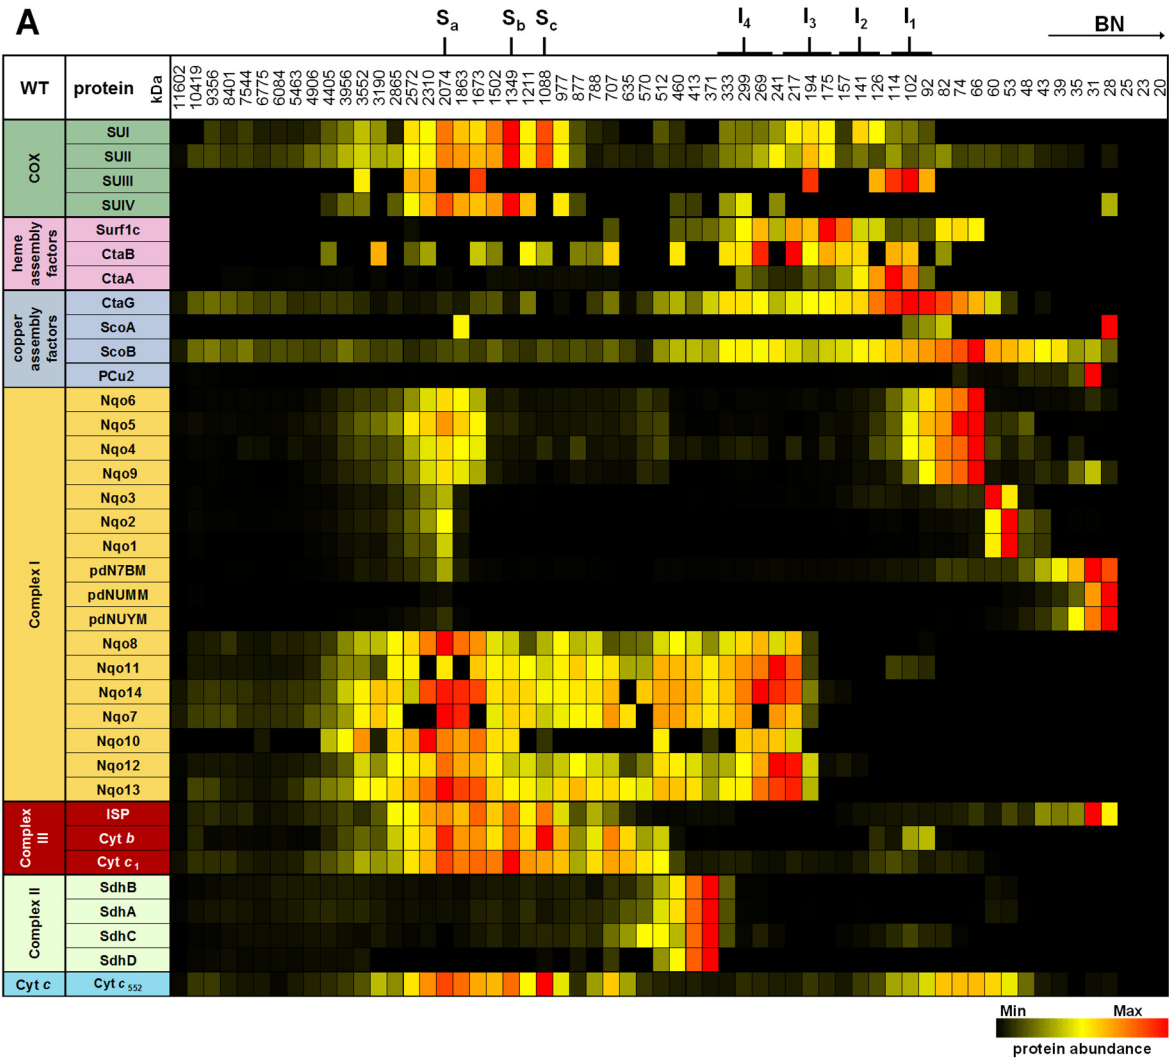

**B**

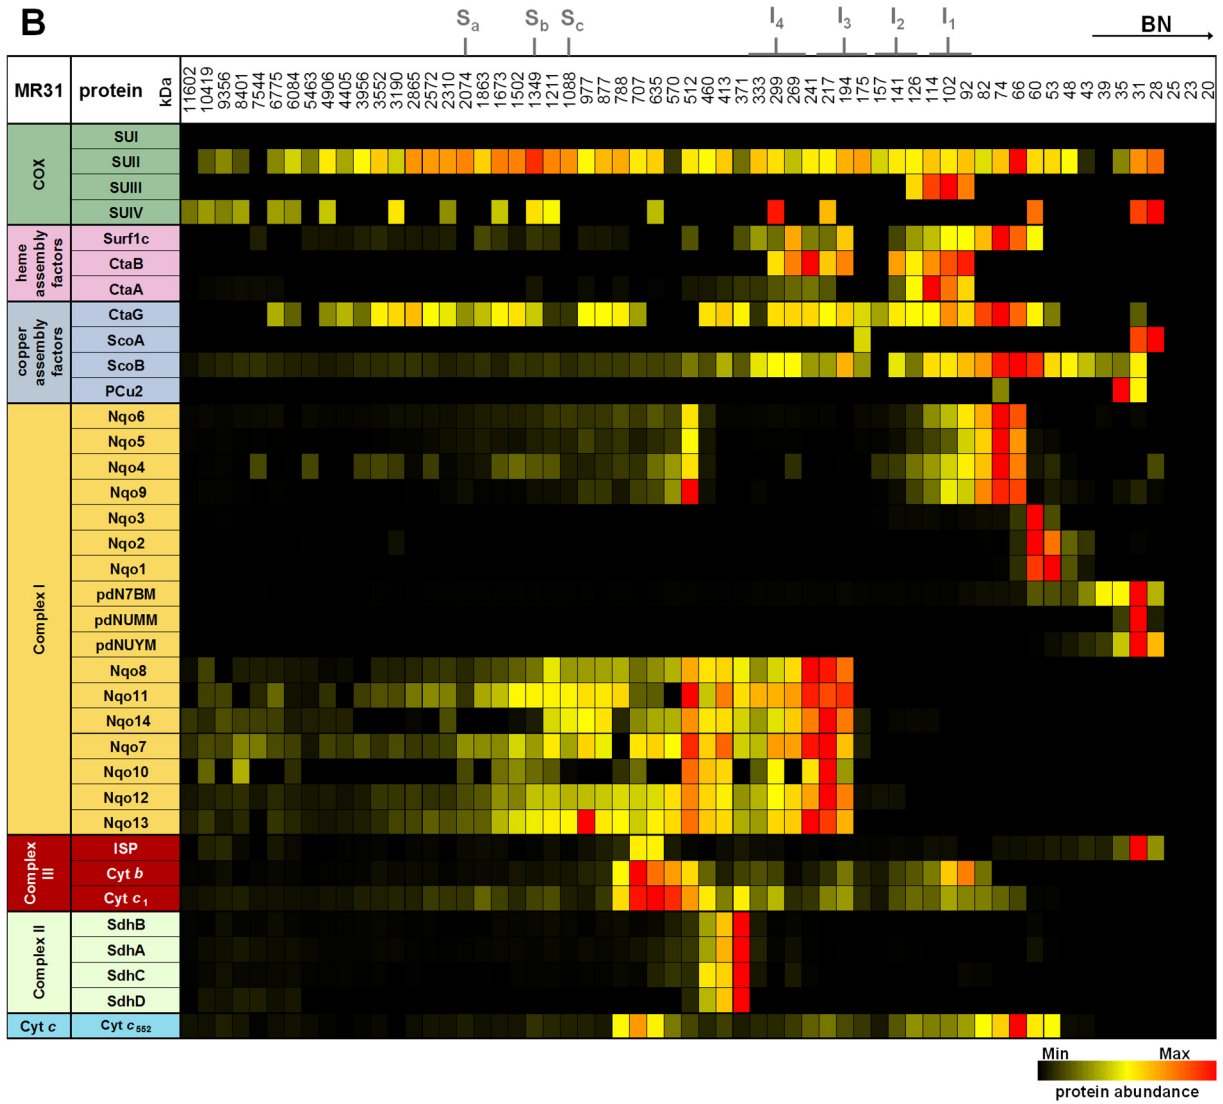

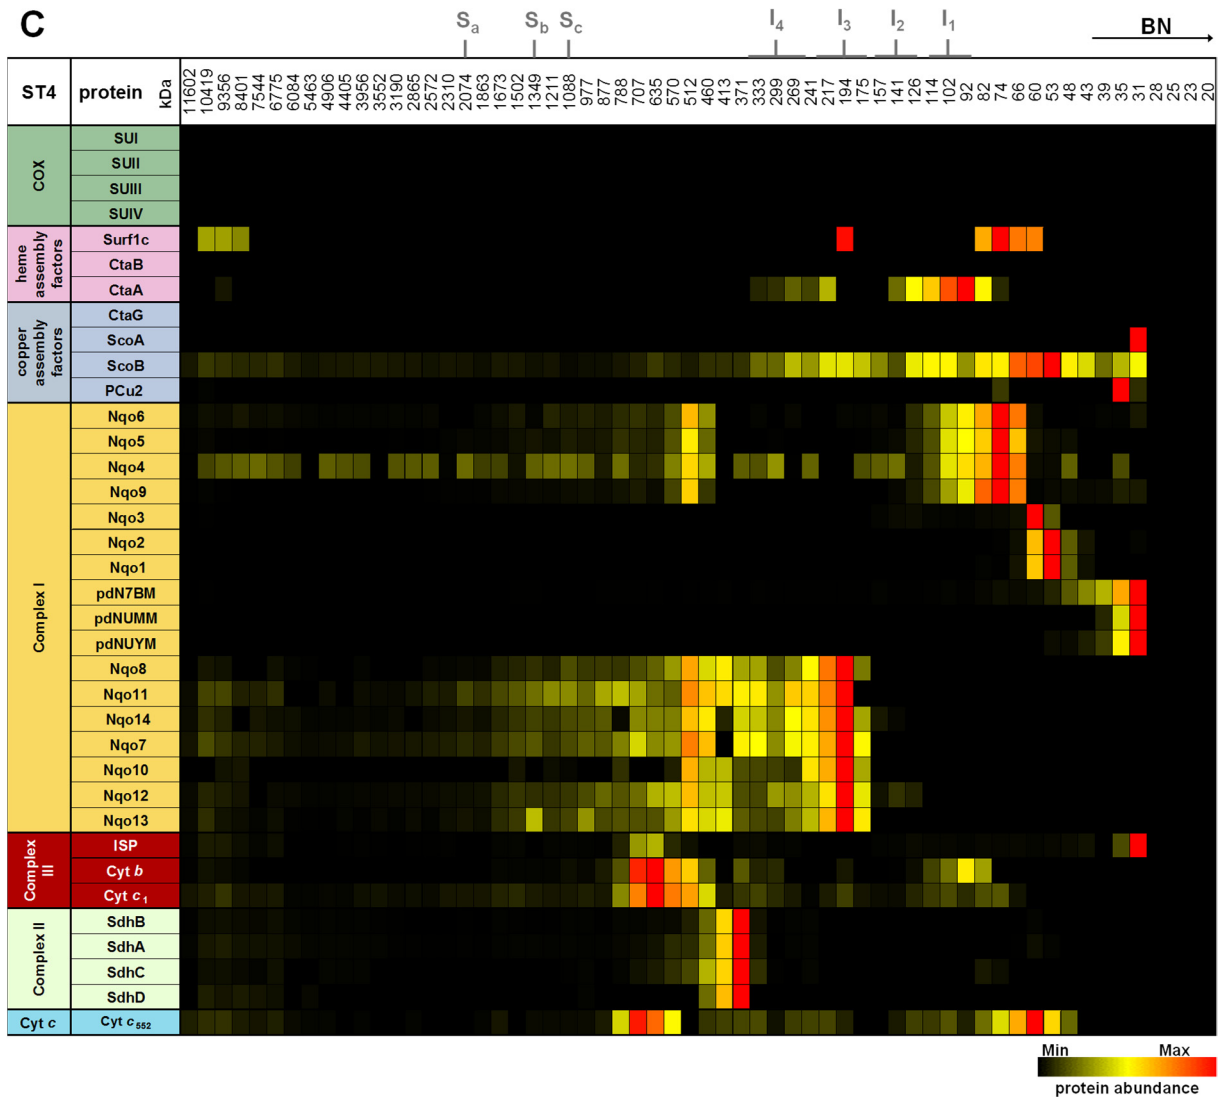

**S3 Fig. Complexome profiles obtained from *P. denitrificans* WT and deletion strains.** Membranes (140  $\mu$ g) obtained from *P. denitrificans* WT (A) and deletion strains MR31 (B) and ST4 (C) were solubilized with digitonin with a detergent/protein ratio of 2 g/g and separated by BN-PAGE. The gel lanes were cut into 60 identical slices, trypsin digested and analyzed by liquid chromatography tandem-mass spectrometry. The complexome profiles of respiratory chain complexes and oxidase assembly factors are shown as heat map illustration. For each identified protein, intensity-based absolute quantification (IBA) values were normalized to maximum appearance over all 60 slices. Oxidative phosphorylation complexes from bovine heart mitochondria were used for mass calibration. The position of supercomplexes  $S_{a-c}$  and assembly intermediates  $I_{1-4}$ , as found in the WT strain, is indicated (black bars in WT, grey bars in strain MR31 and ST4).
