# Supplementary material for: Cytochrome c Oxidase Biogenesis and Metallochaperone Interactions: Steps in the Assembly Pathway of a Bacterial Complex
Source: PLOS journal article supplement (doi:10.1371/journal.pone.0170037), 2017-01-20
Supplement: S4 (10.1371/journal.pone.0170037.s004) [file journal.pone.0170037.s004.pdf]

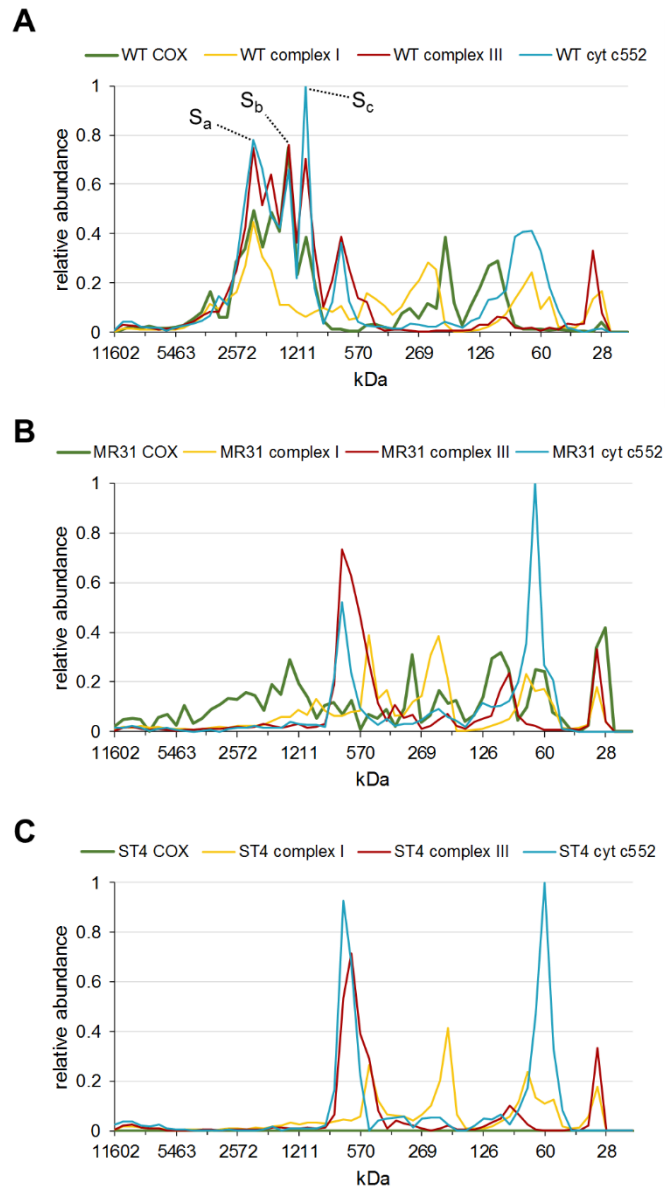

**S4 Fig. Migration profiles of respiratory chain complexes.** Digitonin-solubilized membranes (140  $\mu$ g) from *P. denitrificans* were separated by BN-PAGE and subsequently analyzed by complexome profiling. The average relative abundance value of each complex (taking all its subunits into account) is plotted against the apparent molecular mass in the BN gel. All profiles are coloured as shown in the legend. (A) The migration pattern of respiratory chain complexes I, III and IV, as well as of cyt  $c_{552}$  is shown in a WT background. Co-migration in the supercomplexes  $S_{a-c}$  is indicated, where complex I is only present in supercomplex  $S_a$ . Membranes from strain MR31 (B) or strain ST4 (C) do not exhibit supercomplexes.
